# Supplementary material for: Cryo-EM structure of TFIIH/Rad4–Rad23–Rad33 in damaged DNA opening in nucleotide excision repair
Source: PubMed Central journal article supplement (PMC8184850; doi:10.1038/s41467-021-23684-x), 2021-06-07
Supplement: 41467_2021_23684_MOESM3_ESM.pdf [file 41467_2021_23684_MOESM3_ESM.pdf]

| Protein1                           | Protein2 | Residue 1 | Residue 2 | Relative Score |
|------------------------------------|----------|-----------|-----------|----------------|
| <b>Rad4-Rad23-Rad33 crosslinks</b> |          |           |           |                |
| Rad23                              | Rad23    | 56        | 49        | 142            |
| Rad23                              | Rad23    | 63        | 54        | 117            |
| Rad23                              | Rad23    | 75        | 79        | 146            |
| Rad23                              | Rad23    | 75        | 54        | 27             |
| Rad23                              | Rad23    | 75        | 80        | 171            |
| Rad23                              | Rad4     | 13        | 28        | 115            |
| Rad23                              | Rad4     | 80        | 404       | 176            |
| Rad33                              | Rad4     | 128       | 15        | 142            |
| Rad33                              | Rad4     | 128       | 20        | 155            |
| Rad33                              | Rad4     | 128       | 28        | 148            |
| Rad33                              | Rad4     | 132       | 668       | 183            |
| Rad4                               | Rad23    | 24        | 79        | 128            |
| Rad4                               | Rad23    | 28        | 79        | 58             |
| Rad4                               | Rad23    | 36        | 77        | 45             |
| Rad4                               | Rad23    | 36        | 79        | 166            |
| Rad4                               | Rad23    | 598       | 79        | 156            |
| Rad4                               | Rad23    | 598       | 80        | 87             |
| Rad4                               | Rad23    | 616       | 54        | 145            |
| Rad4                               | Rad33    | 28        | 128       | 148            |
| Rad4                               | Rad4     | 15        | 48        | 158            |
| Rad4                               | Rad4     | 15        | 660       | 170            |
| Rad4                               | Rad4     | 15        | 28        | 149            |
| Rad4                               | Rad4     | 28        | 48        | 106            |
| Rad4                               | Rad4     | 28        | 36        | 139            |
| Rad4                               | Rad4     | 28        | 45        | 41             |
| Rad4                               | Rad4     | 28        | 477       | 105            |
| Rad4                               | Rad4     | 28        | 661       | 179            |
| Rad4                               | Rad4     | 28        | 20        | 151            |
| Rad4                               | Rad4     | 36        | 15        | 95             |
| Rad4                               | Rad4     | 36        | 28        | 36             |
| Rad4                               | Rad4     | 36        | 477       | 142            |
| Rad4                               | Rad4     | 36        | 24        | 149            |
| Rad4                               | Rad4     | 44        | 48        | 47             |
| Rad4                               | Rad4     | 46        | 44        | 137            |
| Rad4                               | Rad4     | 48        | 44        | 182            |
| Rad4                               | Rad4     | 48        | 477       | 101            |
| Rad4                               | Rad4     | 48        | 28        | 128            |
| Rad4                               | Rad4     | 48        | 45        | 224            |

|      |      |     |     |     |
|------|------|-----|-----|-----|
| Rad4 | Rad4 | 48  | 36  | 175 |
| Rad4 | Rad4 | 165 | 369 | 185 |
| Rad4 | Rad4 | 187 | 204 | 183 |
| Rad4 | Rad4 | 204 | 345 | 170 |
| Rad4 | Rad4 | 204 | 346 | 83  |
| Rad4 | Rad4 | 205 | 198 | 161 |
| Rad4 | Rad4 | 212 | 204 | 120 |
| Rad4 | Rad4 | 240 | 247 | 26  |
| Rad4 | Rad4 | 240 | 244 | 182 |
| Rad4 | Rad4 | 240 | 242 | 113 |
| Rad4 | Rad4 | 240 | 245 | 121 |
| Rad4 | Rad4 | 256 | 244 | 162 |
| Rad4 | Rad4 | 256 | 170 | 120 |
| Rad4 | Rad4 | 257 | 170 | 157 |
| Rad4 | Rad4 | 307 | 345 | 156 |
| Rad4 | Rad4 | 326 | 345 | 106 |
| Rad4 | Rad4 | 336 | 346 | 150 |
| Rad4 | Rad4 | 336 | 345 | 181 |
| Rad4 | Rad4 | 336 | 204 | 148 |
| Rad4 | Rad4 | 345 | 477 | 42  |
| Rad4 | Rad4 | 346 | 477 | 148 |
| Rad4 | Rad4 | 346 | 204 | 170 |
| Rad4 | Rad4 | 385 | 350 | 184 |
| Rad4 | Rad4 | 400 | 404 | 126 |
| Rad4 | Rad4 | 400 | 484 | 27  |
| Rad4 | Rad4 | 400 | 492 | 111 |
| Rad4 | Rad4 | 400 | 491 | 182 |
| Rad4 | Rad4 | 442 | 477 | 177 |
| Rad4 | Rad4 | 454 | 492 | 96  |
| Rad4 | Rad4 | 456 | 491 | 47  |
| Rad4 | Rad4 | 456 | 504 | 166 |
| Rad4 | Rad4 | 460 | 492 | 139 |
| Rad4 | Rad4 | 460 | 484 | 185 |
| Rad4 | Rad4 | 460 | 504 | 195 |
| Rad4 | Rad4 | 460 | 507 | 57  |
| Rad4 | Rad4 | 464 | 480 | 177 |
| Rad4 | Rad4 | 468 | 491 | 201 |
| Rad4 | Rad4 | 468 | 504 | 189 |
| Rad4 | Rad4 | 468 | 477 | 91  |
| Rad4 | Rad4 | 468 | 480 | 26  |

|      |      |     |     |     |
|------|------|-----|-----|-----|
| Rad4 | Rad4 | 468 | 484 | 95  |
| Rad4 | Rad4 | 470 | 345 | 162 |
| Rad4 | Rad4 | 470 | 477 | 190 |
| Rad4 | Rad4 | 470 | 480 | 162 |
| Rad4 | Rad4 | 480 | 511 | 168 |
| Rad4 | Rad4 | 480 | 474 | 128 |
| Rad4 | Rad4 | 492 | 484 | 118 |
| Rad4 | Rad4 | 504 | 477 | 164 |
| Rad4 | Rad4 | 521 | 610 | 81  |
| Rad4 | Rad4 | 521 | 514 | 170 |
| Rad4 | Rad4 | 521 | 45  | 115 |
| Rad4 | Rad4 | 521 | 44  | 149 |
| Rad4 | Rad4 | 521 | 492 | 103 |
| Rad4 | Rad4 | 521 | 48  | 159 |
| Rad4 | Rad4 | 598 | 606 | 165 |
| Rad4 | Rad4 | 603 | 36  | 110 |
| Rad4 | Rad4 | 603 | 24  | 83  |
| Rad4 | Rad4 | 660 | 15  | 95  |
| Rad4 | Rad4 | 668 | 15  | 175 |
| Rad4 | Rad4 | 677 | 15  | 169 |

| Protein1                      | Protein2 | Residue 1 | Residue 2 | Relative Score |
|-------------------------------|----------|-----------|-----------|----------------|
| <b>TFIIH-TFIIH crosslinks</b> |          |           |           |                |
| Rad3                          | Rad3     | 2         | 95        | 40             |
| Rad3                          | Rad3     | 2         | 94        | 153            |
| Rad3                          | Rad3     | 30        | 486       | 173            |
| Rad3                          | Rad3     | 30        | 752       | 154            |
| Rad3                          | Rad3     | 30        | 476       | 142            |
| Rad3                          | Rad3     | 30        | 481       | 147            |
| Rad3                          | Rad3     | 30        | 477       | 176            |
| Rad3                          | Rad3     | 92        | 95        | 199            |
| Rad3                          | Rad3     | 94        | 180       | 144            |
| Rad3                          | Rad3     | 112       | 125       | 126            |
| Rad3                          | Rad3     | 112       | 77        | 37             |
| Rad3                          | Rad3     | 121       | 132       | 90             |
| Rad3                          | Rad3     | 121       | 125       | 165            |
| Rad3                          | Rad3     | 122       | 132       | 112            |
| Rad3                          | Rad3     | 122       | 125       | 181            |
| Rad3                          | Rad3     | 125       | 588       | 109            |
| Rad3                          | Rad3     | 125       | 110       | 113            |

|      |      |     |     |     |
|------|------|-----|-----|-----|
| Rad3 | Rad3 | 142 | 125 | 157 |
| Rad3 | Rad3 | 276 | 276 | 155 |
| Rad3 | Rad3 | 276 | 142 | 156 |
| Rad3 | Rad3 | 276 | 125 | 133 |
| Rad3 | Rad3 | 336 | 276 | 40  |
| Rad3 | Rad3 | 347 | 344 | 174 |
| Rad3 | Rad3 | 347 | 276 | 22  |
| Rad3 | Rad3 | 447 | 476 | 49  |
| Rad3 | Rad3 | 605 | 112 | 146 |
| Rad3 | Rad3 | 605 | 125 | 205 |
| Rad3 | Rad3 | 605 | 636 | 54  |
| Rad3 | Rad3 | 616 | 588 | 202 |
| Rad3 | Rad3 | 673 | 489 | 81  |
| Rad3 | Rad3 | 673 | 588 | 148 |
| Rad3 | Rad3 | 689 | 636 | 182 |
| Rad3 | Rad3 | 691 | 481 | 128 |
| Rad3 | Rad3 | 691 | 636 | 114 |
| Rad3 | Rad3 | 746 | 728 | 180 |
| Rad3 | Rad3 | 752 | 30  | 106 |
| Rad3 | Rad3 | 752 | 476 | 187 |
| Rad3 | Rad3 | 752 | 2   | 95  |
| Rad3 | Ssl1 | 30  | 52  | 59  |
| Rad3 | Ssl1 | 276 | 420 | 87  |
| Rad3 | Ssl1 | 476 | 52  | 166 |
| Rad3 | Ssl1 | 737 | 113 | 110 |
| Rad3 | Ssl1 | 740 | 113 | 118 |
| Rad3 | Ssl1 | 750 | 113 | 181 |
| Rad3 | Tfb1 | 94  | 580 | 199 |
| Rad3 | Tfb4 | 2   | 105 | 149 |
| Rad3 | Tfb4 | 94  | 102 | 77  |
| Rad3 | Tfb4 | 276 | 103 | 145 |
| Ssl1 | Rad3 | 52  | 636 | 136 |
| Ssl1 | Rad3 | 420 | 276 | 128 |
| Ssl1 | Ssl1 | 52  | 420 | 149 |
| Ssl1 | Ssl1 | 88  | 420 | 100 |
| Ssl1 | Ssl1 | 113 | 52  | 68  |
| Ssl1 | Ssl1 | 113 | 420 | 82  |
| Ssl1 | Ssl1 | 139 | 201 | 164 |
| Ssl1 | Ssl1 | 198 | 201 | 96  |
| Ssl1 | Ssl1 | 289 | 113 | 191 |

|      |      |     |     |     |
|------|------|-----|-----|-----|
| Ssl1 | Ssl1 | 295 | 315 | 155 |
| Ssl1 | Ssl1 | 306 | 315 | 66  |
| Ssl1 | Ssl1 | 312 | 113 | 181 |
| Ssl1 | Ssl1 | 312 | 118 | 228 |
| Ssl1 | Ssl1 | 395 | 414 | 199 |
| Ssl1 | Ssl1 | 397 | 420 | 159 |
| Ssl1 | Ssl1 | 397 | 414 | 84  |
| Ssl1 | Ssl1 | 397 | 425 | 215 |
| Ssl1 | Ssl1 | 405 | 420 | 47  |
| Ssl1 | Ssl1 | 408 | 420 | 135 |
| Ssl1 | Ssl1 | 408 | 414 | 27  |
| Ssl1 | Ssl1 | 414 | 420 | 113 |
| Ssl1 | Ssl1 | 414 | 397 | 34  |
| Ssl1 | Ssl1 | 420 | 52  | 146 |
| Ssl1 | Ssl1 | 420 | 420 | 176 |
| Ssl1 | Tfb1 | 201 | 255 | 49  |
| Ssl1 | Tfb1 | 205 | 255 | 129 |
| Ssl1 | Tfb1 | 354 | 189 | 194 |
| Ssl1 | Tfb1 | 354 | 512 | 139 |
| Ssl1 | Tfb2 | 198 | 415 | 139 |
| Ssl1 | Tfb2 | 201 | 418 | 150 |
| Ssl1 | Tfb2 | 205 | 418 | 165 |
| Ssl1 | Tfb4 | 326 | 323 | 181 |
| Ssl1 | Tfb4 | 397 | 103 | 189 |
| Ssl1 | Tfb4 | 414 | 99  | 115 |
| Ssl1 | Tfb4 | 414 | 97  | 45  |
| Ssl2 | Rad3 | 228 | 636 | 159 |
| Ssl2 | Ssl1 | 222 | 52  | 130 |
| Ssl2 | Ssl2 | 64  | 71  | 38  |
| Ssl2 | Ssl2 | 65  | 71  | 185 |
| Ssl2 | Ssl2 | 88  | 71  | 191 |
| Ssl2 | Ssl2 | 88  | 73  | 82  |
| Ssl2 | Ssl2 | 90  | 65  | 117 |
| Ssl2 | Ssl2 | 90  | 523 | 176 |
| Ssl2 | Ssl2 | 371 | 224 | 152 |
| Ssl2 | Ssl2 | 372 | 222 | 191 |
| Ssl2 | Ssl2 | 791 | 796 | 196 |
| Ssl2 | Ssl2 | 791 | 795 | 66  |
| Ssl2 | Ssl2 | 822 | 827 | 167 |
| Ssl2 | Ssl2 | 824 | 796 | 192 |

|      |      |     |     |     |
|------|------|-----|-----|-----|
| Ssl2 | Ssl2 | 827 | 796 | 86  |
| Ssl2 | Ssl2 | 827 | 835 | 179 |
| Ssl2 | Ssl2 | 835 | 842 | 220 |
| Ssl2 | Ssl2 | 835 | 843 | 151 |
| Ssl2 | Ssl2 | 835 | 824 | 171 |
| Ssl2 | Ssl2 | 843 | 796 | 47  |
| Ssl2 | Tfb1 | 335 | 73  | 107 |
| Tfb1 | Rad3 | 120 | 276 | 158 |
| Tfb1 | Rad3 | 120 | 125 | 161 |
| Tfb1 | Rad3 | 291 | 276 | 36  |
| Tfb1 | Rad3 | 334 | 588 | 168 |
| Tfb1 | Rad3 | 376 | 125 | 188 |
| Tfb1 | Rad3 | 390 | 588 | 94  |
| Tfb1 | Rad3 | 393 | 588 | 43  |
| Tfb1 | Rad3 | 394 | 588 | 108 |
| Tfb1 | Rad3 | 396 | 588 | 158 |
| Tfb1 | Rad3 | 401 | 588 | 156 |
| Tfb1 | Rad3 | 405 | 588 | 24  |
| Tfb1 | Rad3 | 428 | 95  | 98  |
| Tfb1 | Ssl1 | 120 | 397 | 176 |
| Tfb1 | Ssl1 | 120 | 201 | 55  |
| Tfb1 | Ssl1 | 171 | 315 | 154 |
| Tfb1 | Ssl1 | 189 | 201 | 114 |
| Tfb1 | Ssl1 | 420 | 278 | 191 |
| Tfb1 | Ssl1 | 427 | 113 | 80  |
| Tfb1 | Ssl1 | 444 | 113 | 122 |
| Tfb1 | Ssl1 | 451 | 420 | 29  |
| Tfb1 | Ssl2 | 186 | 796 | 157 |
| Tfb1 | Tfb1 | 55  | 101 | 137 |
| Tfb1 | Tfb1 | 73  | 279 | 195 |
| Tfb1 | Tfb1 | 73  | 183 | 143 |
| Tfb1 | Tfb1 | 73  | 267 | 92  |
| Tfb1 | Tfb1 | 73  | 71  | 193 |
| Tfb1 | Tfb1 | 73  | 69  | 154 |
| Tfb1 | Tfb1 | 73  | 189 | 188 |
| Tfb1 | Tfb1 | 73  | 171 | 168 |
| Tfb1 | Tfb1 | 73  | 268 | 176 |
| Tfb1 | Tfb1 | 83  | 279 | 59  |
| Tfb1 | Tfb1 | 83  | 71  | 172 |
| Tfb1 | Tfb1 | 83  | 69  | 69  |

|      |      |     |     |     |
|------|------|-----|-----|-----|
| Tfb1 | Tfb1 | 83  | 70  | 162 |
| Tfb1 | Tfb1 | 109 | 268 | 168 |
| Tfb1 | Tfb1 | 111 | 279 | 121 |
| Tfb1 | Tfb1 | 112 | 69  | 202 |
| Tfb1 | Tfb1 | 117 | 171 | 123 |
| Tfb1 | Tfb1 | 120 | 173 | 191 |
| Tfb1 | Tfb1 | 120 | 279 | 102 |
| Tfb1 | Tfb1 | 120 | 71  | 119 |
| Tfb1 | Tfb1 | 120 | 70  | 168 |
| Tfb1 | Tfb1 | 120 | 580 | 162 |
| Tfb1 | Tfb1 | 120 | 65  | 128 |
| Tfb1 | Tfb1 | 120 | 268 | 80  |
| Tfb1 | Tfb1 | 120 | 69  | 185 |
| Tfb1 | Tfb1 | 120 | 171 | 110 |
| Tfb1 | Tfb1 | 120 | 186 | 90  |
| Tfb1 | Tfb1 | 120 | 458 | 157 |
| Tfb1 | Tfb1 | 171 | 581 | 69  |
| Tfb1 | Tfb1 | 183 | 70  | 31  |
| Tfb1 | Tfb1 | 183 | 120 | 160 |
| Tfb1 | Tfb1 | 186 | 71  | 174 |
| Tfb1 | Tfb1 | 186 | 70  | 154 |
| Tfb1 | Tfb1 | 189 | 120 | 93  |
| Tfb1 | Tfb1 | 189 | 70  | 195 |
| Tfb1 | Tfb1 | 225 | 267 | 93  |
| Tfb1 | Tfb1 | 227 | 267 | 46  |
| Tfb1 | Tfb1 | 252 | 255 | 193 |
| Tfb1 | Tfb1 | 267 | 71  | 190 |
| Tfb1 | Tfb1 | 267 | 120 | 219 |
| Tfb1 | Tfb1 | 267 | 70  | 149 |
| Tfb1 | Tfb1 | 276 | 71  | 153 |
| Tfb1 | Tfb1 | 276 | 120 | 90  |
| Tfb1 | Tfb1 | 276 | 267 | 86  |
| Tfb1 | Tfb1 | 279 | 71  | 133 |
| Tfb1 | Tfb1 | 279 | 70  | 167 |
| Tfb1 | Tfb1 | 291 | 295 | 168 |
| Tfb1 | Tfb1 | 300 | 290 | 47  |
| Tfb1 | Tfb1 | 300 | 291 | 34  |
| Tfb1 | Tfb1 | 324 | 268 | 158 |
| Tfb1 | Tfb1 | 334 | 267 | 190 |
| Tfb1 | Tfb1 | 334 | 393 | 44  |

|      |      |     |     |     |
|------|------|-----|-----|-----|
| Tfb1 | Tfb1 | 334 | 394 | 173 |
| Tfb1 | Tfb1 | 396 | 390 | 155 |
| Tfb1 | Tfb1 | 401 | 173 | 46  |
| Tfb1 | Tfb1 | 401 | 390 | 199 |
| Tfb1 | Tfb1 | 402 | 173 | 62  |
| Tfb1 | Tfb1 | 438 | 444 | 91  |
| Tfb1 | Tfb1 | 438 | 428 | 214 |
| Tfb1 | Tfb1 | 444 | 458 | 24  |
| Tfb1 | Tfb1 | 444 | 438 | 153 |
| Tfb1 | Tfb1 | 445 | 458 | 142 |
| Tfb1 | Tfb1 | 446 | 438 | 31  |
| Tfb1 | Tfb1 | 458 | 438 | 203 |
| Tfb1 | Tfb1 | 574 | 171 | 200 |
| Tfb1 | Tfb1 | 578 | 171 | 84  |
| Tfb1 | Tfb1 | 580 | 268 | 163 |
| Tfb1 | Tfb4 | 71  | 323 | 133 |
| Tfb1 | Tfb4 | 73  | 323 | 141 |
| Tfb1 | Tfb4 | 171 | 323 | 149 |
| Tfb1 | Tfb4 | 444 | 277 | 73  |
| Tfb1 | Tfb4 | 451 | 323 | 142 |
| Tfb1 | Tfb4 | 458 | 144 | 103 |
| Tfb1 | Tfb4 | 515 | 207 | 28  |
| Tfb1 | Tfb4 | 578 | 323 | 174 |
| Tfb1 | Tfb4 | 580 | 332 | 132 |
| Tfb2 | Rad3 | 237 | 276 | 186 |
| Tfb2 | Ssl1 | 313 | 420 | 102 |
| Tfb2 | Ssl1 | 313 | 201 | 80  |
| Tfb2 | Ssl1 | 326 | 113 | 190 |
| Tfb2 | Ssl1 | 326 | 414 | 128 |
| Tfb2 | Ssl1 | 326 | 417 | 159 |
| Tfb2 | Ssl1 | 415 | 201 | 109 |
| Tfb2 | Ssl1 | 418 | 201 | 158 |
| Tfb2 | Ssl1 | 419 | 201 | 163 |
| Tfb2 | Ssl2 | 168 | 71  | 198 |
| Tfb2 | Ssl2 | 170 | 71  | 174 |
| Tfb2 | Tfb2 | 80  | 506 | 173 |
| Tfb2 | Tfb2 | 262 | 238 | 146 |
| Tfb2 | Tfb2 | 326 | 284 | 110 |
| Tfb2 | Tfb2 | 419 | 415 | 159 |
| Tfb2 | Tfb2 | 487 | 489 | 182 |

|      |      |     |     |     |
|------|------|-----|-----|-----|
| Tfb2 | Tfb2 | 488 | 490 | 164 |
| Tfb2 | Tfb2 | 490 | 488 | 142 |
| Tfb2 | Tfb2 | 499 | 171 | 81  |
| Tfb2 | Tfb2 | 506 | 511 | 62  |
| Tfb2 | Tfb4 | 238 | 144 | 141 |
| Tfb2 | Tfb4 | 238 | 103 | 169 |
| Tfb2 | Tfb4 | 262 | 103 | 131 |
| Tfb2 | Tfb4 | 267 | 102 | 34  |
| Tfb2 | Tfb4 | 283 | 174 | 85  |
| Tfb2 | Tfb4 | 284 | 173 | 133 |
| Tfb2 | Tfb4 | 313 | 174 | 44  |
| Tfb2 | Tfb4 | 326 | 173 | 32  |
| Tfb2 | Tfb4 | 326 | 207 | 118 |
| Tfb2 | Tfb4 | 326 | 103 | 211 |
| Tfb2 | Tfb4 | 343 | 173 | 163 |
| Tfb2 | Tfb4 | 419 | 174 | 135 |
| Tfb2 | Tfb4 | 506 | 167 | 54  |
| Tfb2 | Tfb5 | 495 | 51  | 188 |
| Tfb2 | Tfb5 | 499 | 6   | 201 |
| Tfb2 | Tfb5 | 506 | 6   | 149 |
| Tfb4 | Rad3 | 102 | 276 | 137 |
| Tfb4 | Rad3 | 102 | 125 | 182 |
| Tfb4 | Ssl1 | 95  | 414 | 192 |
| Tfb4 | Ssl1 | 95  | 397 | 195 |
| Tfb4 | Ssl1 | 99  | 414 | 123 |
| Tfb4 | Ssl1 | 99  | 397 | 174 |
| Tfb4 | Ssl1 | 102 | 420 | 149 |
| Tfb4 | Ssl1 | 102 | 113 | 176 |
| Tfb4 | Ssl1 | 103 | 397 | 43  |
| Tfb4 | Ssl1 | 138 | 397 | 193 |
| Tfb4 | Ssl1 | 319 | 315 | 69  |
| Tfb4 | Ssl1 | 319 | 326 | 138 |
| Tfb4 | Ssl1 | 321 | 315 | 130 |
| Tfb4 | Tfb1 | 319 | 171 | 62  |
| Tfb4 | Tfb1 | 321 | 171 | 113 |
| Tfb4 | Tfb2 | 105 | 238 | 189 |
| Tfb4 | Tfb2 | 108 | 238 | 99  |
| Tfb4 | Tfb4 | 84  | 138 | 179 |
| Tfb4 | Tfb4 | 87  | 102 | 168 |
| Tfb4 | Tfb4 | 95  | 144 | 140 |

|      |      |     |     |     |
|------|------|-----|-----|-----|
| Tfb4 | Tfb4 | 95  | 138 | 44  |
| Tfb4 | Tfb4 | 99  | 138 | 178 |
| Tfb4 | Tfb4 | 102 | 137 | 30  |
| Tfb4 | Tfb4 | 105 | 102 | 182 |
| Tfb4 | Tfb4 | 108 | 103 | 42  |
| Tfb4 | Tfb4 | 115 | 102 | 183 |
| Tfb4 | Tfb4 | 137 | 102 | 79  |
| Tfb4 | Tfb4 | 137 | 103 | 166 |
| Tfb4 | Tfb4 | 138 | 103 | 89  |
| Tfb4 | Tfb4 | 144 | 102 | 96  |
| Tfb4 | Tfb4 | 171 | 207 | 155 |
| Tfb4 | Tfb4 | 173 | 207 | 56  |
| Tfb4 | Tfb4 | 174 | 207 | 56  |
| Tfb4 | Tfb4 | 207 | 207 | 116 |
| Tfb4 | Tfb4 | 319 | 323 | 156 |
| Tfb4 | Tfb4 | 323 | 330 | 62  |
| Tfb4 | Tfb4 | 323 | 332 | 59  |
| Tfb5 | Ssl2 | 59  | 65  | 123 |
| Tfb5 | Tfb2 | 6   | 80  | 90  |
| Tfb5 | Tfb4 | 6   | 171 | 155 |

| Protein1                                 | Protein2 | Residue 1 | Residue 2 | Relative Score |
|------------------------------------------|----------|-----------|-----------|----------------|
| <b>TFIIH/Rad4-Rad23-Rad33 crosslinks</b> |          |           |           |                |
| Rad23                                    | Tfb4     | 54        | 102       | 97             |
| Rad33                                    | Ssl2     | 58        | 796       | 175            |
| Rad4                                     | Ssl1     | 379       | 414       | 139            |
| Ssl2                                     | Rad4     | 624       | 36        | 127            |
| Tfb1                                     | Rad23    | 120       | 54        | 223            |
| Tfb1                                     | Rad4     | 73        | 48        | 147            |
| Tfb1                                     | Rad4     | 109       | 24        | 167            |
| Tfb1                                     | Rad4     | 120       | 48        | 102            |
| Tfb1                                     | Rad4     | 120       | 36        | 41             |
| Tfb1                                     | Rad4     | 120       | 477       | 163            |
| Tfb1                                     | Rad4     | 243       | 48        | 49             |
| Tfb1                                     | Rad4     | 279       | 477       | 134            |
| Tfb1                                     | Rad4     | 279       | 48        | 98             |
| Tfb4                                     | Rad4     | 95        | 379       | 122            |
| Tfb4                                     | Rad4     | 138       | 379       | 92             |
| Tfb4                                     | Rad4     | 323       | 477       | 31             |
